# Supplementary material for: Indigo Carmine in a Food Dye: Spectroscopic Characterization and Determining Its Micro-Concentration through the Clock Reaction
Source: MDPI journal article supplement (doi:10.3390/molecules27154853), 2022-07-29
Supplement: s1 [file s1]

## SUPPLEMENTARY MATERIAL

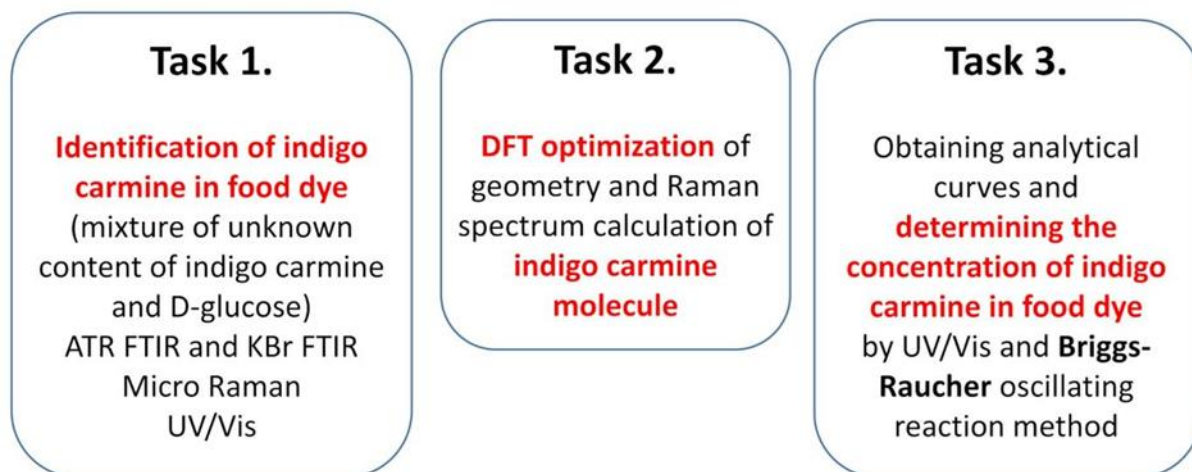

**Figure S1. The flow of experimental tasks .**

### ATR AND KBr FTIR SPECTROSCOPY

ATR was done first as it is the most robust technique. Since it did not yield conclusive results, KBr FTIR, a more sensitive technique, also did not detect indigo carmine. These preliminary results suggested that indigo carmine is present in low concentrations in the food dye. The results obtained for the ATR and KBr measurements of the food dye are presented in Figure S2. a) and Figure S2 b). The vibrations of molecular groups are listed in Table S1.

## THE PEAKS OF THE INFRARED SPECTRUM OF D-GLUCOSE (DEXTROSE)

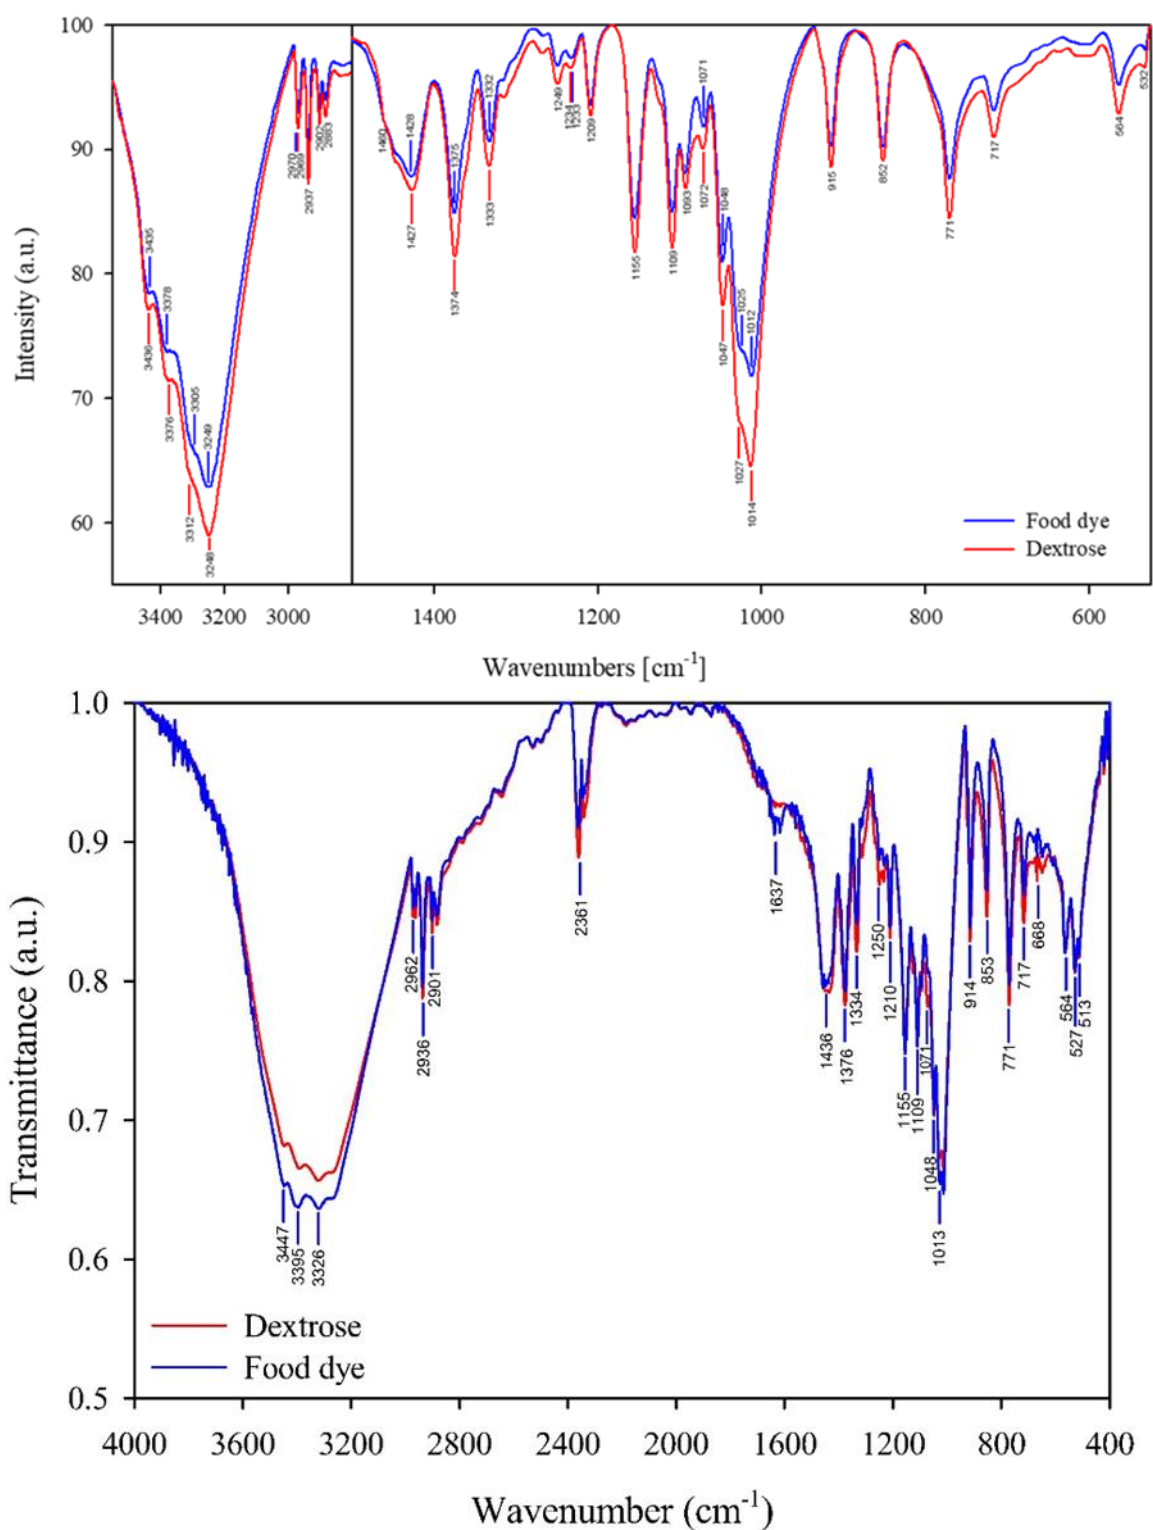

**Figure S2. a)** The ATR FTIR spectra of the food dye and of D-glucose (dextrose)

**Figure S2. b)** The KBr-pellet IR spectrum of food dye and D-glucose

The high amount of dextrose in food dye implicates the overlapping spectra of dextrose and food dye that may be observed from Figure S2 a) and b). Due to the overlapping spectra of dextrose and food dye, there is no specific peak indicating the confirmation of indigo carmine that may be observed. Thereby, only a small amount of indigo carmine is shown to be in this food dye which is composed of indigo carmine and dextrose. For this reason, we find that indigo carmine cannot be detected by such bulk sample techniques as ATR and KBr.

The following table lays out the assignment of dextrose peaks in both the FTIR spectra.

**Table S1: The assignment of the dextrose peaks of the infrared spectrum**

| IR   | $\alpha$ -D | $\beta$ -D-M | D-glucose[S1]<br>Assignment                           | ATR  | KBr            |
|------|-------------|--------------|-------------------------------------------------------|------|----------------|
| 3410 | 3418        | 3146         | $\nu$ OH                                              | 3248 | 3326,3347,3395 |
| 3393 | 3408        | 3123         | $\nu$ OH                                              | 2970 | 2962           |
| 2944 | 2963        | 3099         | $\nu_s$ CH of C <sub>2</sub>                          | 2937 | 2936           |
| 2913 | 2939        | 3085         | $\nu_{as}$ CH of C <sub>1</sub>                       | 2902 | 2901           |
| 1460 | 1441        | 1465         | $\delta$ CH <sub>2</sub> + $\delta$ OHC+ $\delta$ CCH | 1427 | 1436           |
| 1382 | 1352        | 1390         | $\delta$ OCHC+ $\delta$ COH+ $\delta$ CCH             | 1374 | 1376           |
| 1340 | 1333        | 1320         | $\delta$ CCH+ $\delta$ OHC                            | 1333 | 1334           |
| 1224 | 1218        | 1278         | $\delta$ CH+ $\delta$ OH in plane                     | 1249 | 1250           |
| 1203 | 1220        | 1232         | $\delta$ CH+ $\delta$ OH in plane                     | 1209 | 1210           |
| 1149 | 1137        | 1205         | $\nu$ CO + $\nu$ CC                                   | 1155 | 1155           |
| 1111 | 1116        | 1162         | $\nu$ CO                                              | 1109 | 1109           |
| 1050 | 1058        | 1088         | $\nu$ CO + $\nu$ CC                                   | 1072 | 1071           |
| 1025 | 1026        | 1066         | $\nu$ CO                                              | 1047 | 1048           |
| 995  | 944         | 1032         | $\nu$ CO + $\nu$ CC                                   | 1014 | 1013           |
| 915  | 900         | 993          | $\nu$ CO + $\nu$ CC+ $\nu_{as}$ ring of<br>pyranose   | 915  | 914            |
| 837  | 834         | 909          | $\delta$ CH                                           | 852  | 853            |
| 776  | 762         | 815          | $\delta$ CCO+ $\delta$ CCH                            | 771  | 771            |
| 622  | 619         | 694          | CH <sub>2</sub>                                       | 717  | 717            |

KBr, a more sensitive technique compared to ATR, yielded almost entirely similar peak positions in the IR spectra. Only the bands corresponding to stretching OH vibrations are not in the same positions, as well as for the vibrations of  $\delta$ CH<sub>2</sub>+ $\delta$ OHC+ $\delta$ CCH [S1]. The peak positioned at 564 cm<sup>-1</sup> is of CCO, OCO and CCH, while the peak positioned at 527 cm<sup>-1</sup> is of  $\tau$ CO, OCO, CO,  $\tau$ CCO vibrations. The peak positioned at 513 cm<sup>-1</sup> is of  $\tau$ CO and

C<sub>4</sub>C<sub>5</sub>O<sub>5</sub>[S<sub>2</sub>] . The peak that appears at 1637 cm<sup>-1</sup> is absorbed water in the material. The peaks positioned at 2343 cm<sup>-1</sup>, 2361 cm<sup>-1</sup> and 668 cm<sup>-1</sup> belong to the uncorrected CO<sub>2</sub>.

## RAMAN SPECTROSCOPY

**Table S2.** The lengths and angles between the atoms in the indigo carmine molecule

| Bond                             | Bound length/Å | Bond                                              | Angle/ °  | Bond                                              | Angle/ °  |
|----------------------------------|----------------|---------------------------------------------------|-----------|---------------------------------------------------|-----------|
| O <sub>27</sub> =S <sub>25</sub> | 1.49635        | O <sub>27</sub> =S <sub>25</sub> =O <sub>26</sub> | 111.06899 | H <sub>30</sub> -C <sub>10</sub> -C <sub>7</sub>  | 120.77773 |
| S <sub>25</sub> =O <sub>26</sub> | 1.49873        | O <sub>26</sub> =S <sub>25</sub> =O <sub>28</sub> | 110.21532 | C <sub>10</sub> -C <sub>7</sub> -C <sub>6</sub>   | 120.67618 |
| S <sub>25</sub> =O <sub>28</sub> | 1.49802        | O <sub>27</sub> =S <sub>25</sub> =O <sub>28</sub> | 111.10462 | C <sub>10</sub> -C <sub>11</sub> -S <sub>14</sub> | 118.57470 |
| S <sub>25</sub> -C <sub>22</sub> | 1.79833        | O <sub>25</sub> -C <sub>22</sub> -C <sub>21</sub> | 118.57478 | C <sub>12</sub> -C <sub>11</sub> -S <sub>14</sub> | 119.89087 |
| C <sub>22</sub> -C <sub>21</sub> | 1.39590        | C <sub>22</sub> -C <sub>21</sub> -H <sub>34</sub> | 121.40348 | C <sub>11</sub> -S <sub>14</sub> =O <sub>15</sub> | 108.03586 |
| C <sub>21</sub> -H <sub>34</sub> | 1.08608        | H <sub>34</sub> -C <sub>21</sub> -C <sub>20</sub> | 120.77773 | O <sub>15</sub> =S <sub>14</sub> =O <sub>17</sub> | 110.21540 |
| C <sub>21</sub> -C <sub>20</sub> | 1.39306        | C <sub>21</sub> -C <sub>20</sub> -C <sub>19</sub> | 120.67618 | O <sub>17</sub> =S <sub>14</sub> =O <sub>16</sub> | 111.07746 |
| C <sub>20</sub> -C <sub>19</sub> | 1.41859        | C <sub>20</sub> -C <sub>19</sub> -C <sub>24</sub> | 121.36016 | O <sub>15</sub> =S <sub>14</sub> =O <sub>16</sub> | 111.09590 |
| C <sub>19</sub> -C <sub>24</sub> | 1.39516        | C <sub>19</sub> -C <sub>24</sub> -H <sub>36</sub> | 121.57856 | O <sub>26</sub> =S <sub>25</sub> -C <sub>22</sub> | 108.00656 |
| C <sub>24</sub> -H <sub>36</sub> | 1.08559        | H <sub>36</sub> -C <sub>24</sub> -C <sub>23</sub> | 120.82717 | O <sub>27</sub> =S <sub>25</sub> -C <sub>22</sub> | 108.25944 |
| C <sub>23</sub> -C <sub>24</sub> | 1.39787        | C <sub>24</sub> -C <sub>23</sub> -H <sub>35</sub> | 120.45778 | C <sub>22</sub> -C <sub>21</sub> -C <sub>20</sub> | 117.81876 |
| C <sub>23</sub> -H <sub>35</sub> | 1.08497        | H <sub>35</sub> -C <sub>23</sub> -C <sub>22</sub> | 118.52595 | C <sub>19</sub> -C <sub>24</sub> -C <sub>23</sub> | 117.59427 |
| C <sub>23</sub> -C <sub>22</sub> | 1.40501        | C <sub>23</sub> -C <sub>22</sub> -C <sub>21</sub> | 121.53435 | C <sub>24</sub> -C <sub>23</sub> -C <sub>22</sub> | 121.01627 |
| C <sub>20</sub> -C <sub>2</sub>  | 1.47023        | C <sub>20</sub> -C <sub>2</sub> =O <sub>1</sub>   | 130.53313 | C <sub>20</sub> -C <sub>2</sub> -C <sub>3</sub>   | 104.04648 |
| C <sub>2</sub> =O <sub>1</sub>   | 1.23341        | O <sub>1</sub> -C <sub>2</sub> -C <sub>3</sub>    | 125.42037 | C <sub>19</sub> -C <sub>20</sub> -C <sub>2</sub>  | 107.69036 |
| C <sub>2</sub> -C <sub>3</sub>   | 1.49639        | C <sub>2</sub> -C <sub>3</sub> -N <sub>18</sub>   | 108.40419 | C <sub>6</sub> -N <sub>5</sub> -C <sub>4</sub>    | 110.27459 |
| C <sub>3</sub> -N <sub>18</sub>  | 1.37710        | C <sub>3</sub> -N <sub>18</sub> -H <sub>33</sub>  | 122.17508 | N <sub>5</sub> -C <sub>4</sub> -C <sub>8</sub>    | 108.40419 |
| N <sub>18</sub> -H <sub>33</sub> | 1.01219        | C <sub>3</sub> -N <sub>18</sub> -C <sub>19</sub>  | 110.27459 | C <sub>11</sub> -S <sub>14</sub> =O <sub>16</sub> | 108.25949 |
| N <sub>18</sub> -C <sub>19</sub> | 1.38540        | N <sub>18</sub> -C <sub>19</sub> -C <sub>20</sub> | 109.58438 | S <sub>25</sub> -C <sub>22</sub> =C <sub>23</sub> | 119.09087 |
| C <sub>3</sub> =C <sub>4</sub>   | 1.36648        | C <sub>2</sub> -C <sub>3</sub> =C <sub>4</sub>    | 126.37752 | C <sub>21</sub> -C <sub>20</sub> -C <sub>2</sub>  | 131.63345 |
| C <sub>4</sub> -N <sub>5</sub>   | 1.37710        | N <sub>18</sub> -C <sub>3</sub> =C <sub>4</sub>   | 125.21829 | C <sub>24</sub> -C <sub>19</sub> -N <sub>18</sub> | 129.05546 |
| N <sub>5</sub> -H <sub>29</sub>  | 1.01134        | C <sub>3</sub> =C <sub>4</sub> -N <sub>5</sub>    | 125.21829 | C <sub>13</sub> -C <sub>6</sub> -C <sub>7</sub>   | 121.36016 |
| N <sub>5</sub> -C <sub>6</sub>   | 1.38540        | C <sub>3</sub> =C <sub>4</sub> -C <sub>8</sub>    | 126.37752 | C <sub>22</sub> -S <sub>25</sub> -O <sub>26</sub> | 108.00656 |
| C <sub>6</sub> -C <sub>7</sub>   | 1.41859        | C <sub>4</sub> -C <sub>8</sub> =O <sub>9</sub>    | 125.42038 | C <sub>22</sub> -S <sub>25</sub> -O <sub>27</sub> | 108.25944 |
| C <sub>7</sub> -C <sub>8</sub>   | 1.47023        | C <sub>4</sub> -C <sub>8</sub> -C <sub>7</sub>    | 104.04648 | C <sub>22</sub> -S <sub>25</sub> -O <sub>28</sub> | 108.06455 |
| C <sub>8</sub> -O <sub>9</sub>   | 1.23341        | O <sub>9</sub> =C <sub>8</sub> -C <sub>7</sub>    | 130.53314 | C <sub>11</sub> -S <sub>14</sub> -O <sub>16</sub> | 108.25944 |
| C <sub>8</sub> -C <sub>4</sub>   | 1.49639        | C <sub>8</sub> -C <sub>7</sub> -C <sub>6</sub>    | 107.69036 | C <sub>11</sub> -S <sub>14</sub> -O <sub>15</sub> | 108.03586 |
| C <sub>6</sub> -C <sub>13</sub>  | 1.39516        | C <sub>7</sub> -C <sub>6</sub> -N <sub>5</sub>    | 109.58438 | C <sub>11</sub> -S <sub>14</sub> -O <sub>17</sub> | 108.03539 |

|                                  |         |                                                   |           |
|----------------------------------|---------|---------------------------------------------------|-----------|
| C <sub>13</sub> -H <sub>32</sub> | 1.08559 | C <sub>6</sub> -N <sub>5</sub> -H <sub>29</sub>   | 127.58039 |
| C <sub>13</sub> -C <sub>12</sub> | 1.39787 | H <sub>29</sub> -N <sub>5</sub> -C <sub>4</sub>   | 122.14502 |
| C <sub>12</sub> -H <sub>31</sub> | 1.08497 | N <sub>5</sub> -C <sub>6</sub> -C <sub>13</sub>   | 129.05546 |
| C <sub>12</sub> -H <sub>11</sub> | 1.40501 | C <sub>6</sub> -C <sub>13</sub> -H <sub>32</sub>  | 121.57856 |
| C <sub>11</sub> -C <sub>9</sub>  | 1.39590 | H <sub>32</sub> -C <sub>13</sub> -C <sub>12</sub> | 120.82717 |
| C <sub>10</sub> -H <sub>30</sub> | 1.08608 | C <sub>6</sub> -C <sub>13</sub> -C <sub>12</sub>  | 117.59427 |
| C <sub>10</sub> -C <sub>7</sub>  | 1.39306 | C <sub>13</sub> -C <sub>12</sub> -H <sub>31</sub> | 120.45778 |
| C <sub>7</sub> -C <sub>6</sub>   | 1.41859 | H <sub>31</sub> -C <sub>12</sub> -C <sub>11</sub> | 118.52595 |
| C <sub>11</sub> -S <sub>14</sub> | 1.79833 | C <sub>13</sub> -C <sub>12</sub> -C <sub>11</sub> | 121.01627 |
| S <sub>14</sub> =O <sub>16</sub> | 1.49634 | C <sub>12</sub> -C <sub>11</sub> -C <sub>10</sub> | 121.53435 |
| S <sub>14</sub> =O <sub>17</sub> | 1.49817 | C <sub>11</sub> -C <sub>10</sub> -H <sub>30</sub> | 121.40348 |
| S <sub>14</sub> =O <sub>15</sub> | 1.49856 | C <sub>11</sub> -C <sub>10</sub> -C <sub>7</sub>  | 117.81876 |

**Table S3.** The theoretical and experimental values of the vibration bands obtained in this current research compared to the literature [25 from manuscript]

| This research |         | Literature[25] |             |                    |             |                    |
|---------------|---------|----------------|-------------|--------------------|-------------|--------------------|
| B97D          |         | B3PW91         |             |                    | B3LYP       |                    |
| Exp.          | cc-pVTZ | Exp.           | LANL2D<br>Z | 6-<br>311++G*<br>* | LANL2<br>DZ | 6-<br>311++G*<br>* |
| 1240          | 1235    | 1240           | 1239        | 1243               | 1265        | 1244               |
| 1296          | 1293    | 1290           | 1288        | 1280               | 1288        | 1296               |
| 1346          | 1348    | 1344           | 1357        | 1345               | 1343        | 1352               |
| 1576          | 1588    | 1576           | 1511        | 1509               | 1621        | 1616               |
| 1626          | 1625    | 1623           | 1640        | 1632               | 1635        | 1634               |
| 1697          | 1703    | 1698           | 1687        | 1701               | 1669        | 1681               |

**Video1.mp4 to video4.mp4** record the molecule's vibration for the bands as indicated by the arrows in Figure S3.

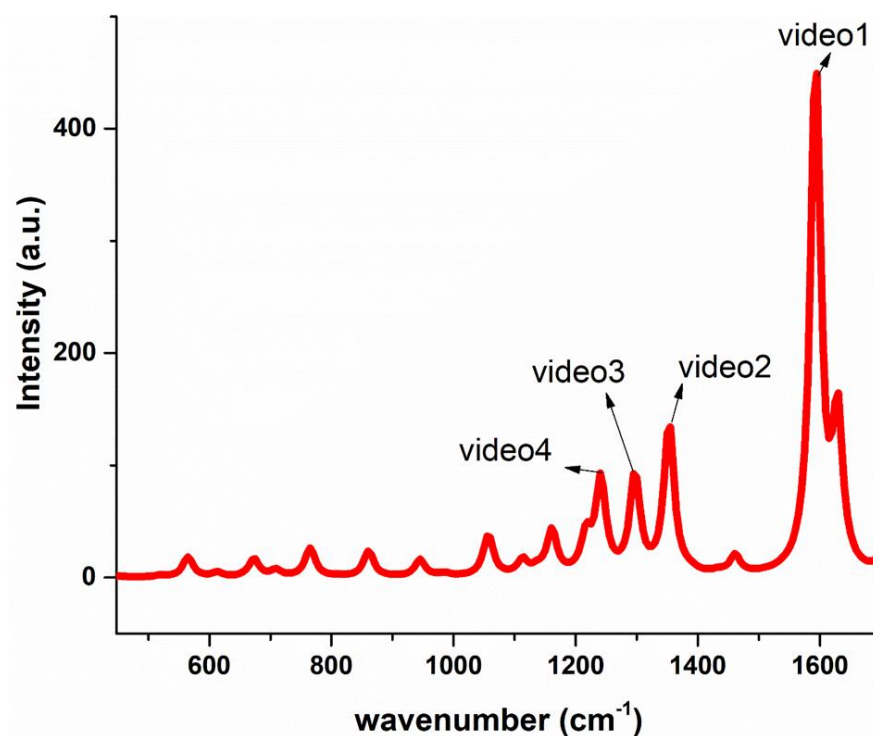

**Figure S3.** The multimedia (video1.mp4 to video4.mp4) of complex vibrations of the indigo carmine functional groups obtained for the most intensive peaks

The Gaussian output log file (4447431\_opt\_raman\_Na.log) may be used to read the Raman vibrations of indigo carmine in Facio software.

### UV/VIS METHOD

According to the UV/Vis spectra obtained for an aqueous solutions of indigo carmine, an analytical curve was plotted, as presented in Figure S4. The absorbance of the measured aqueous solution of the mixture of indigo carmine and dextrose has been marked in the UV Vis analytical curve. The points chosen to create the analytical curve are marked in orange.

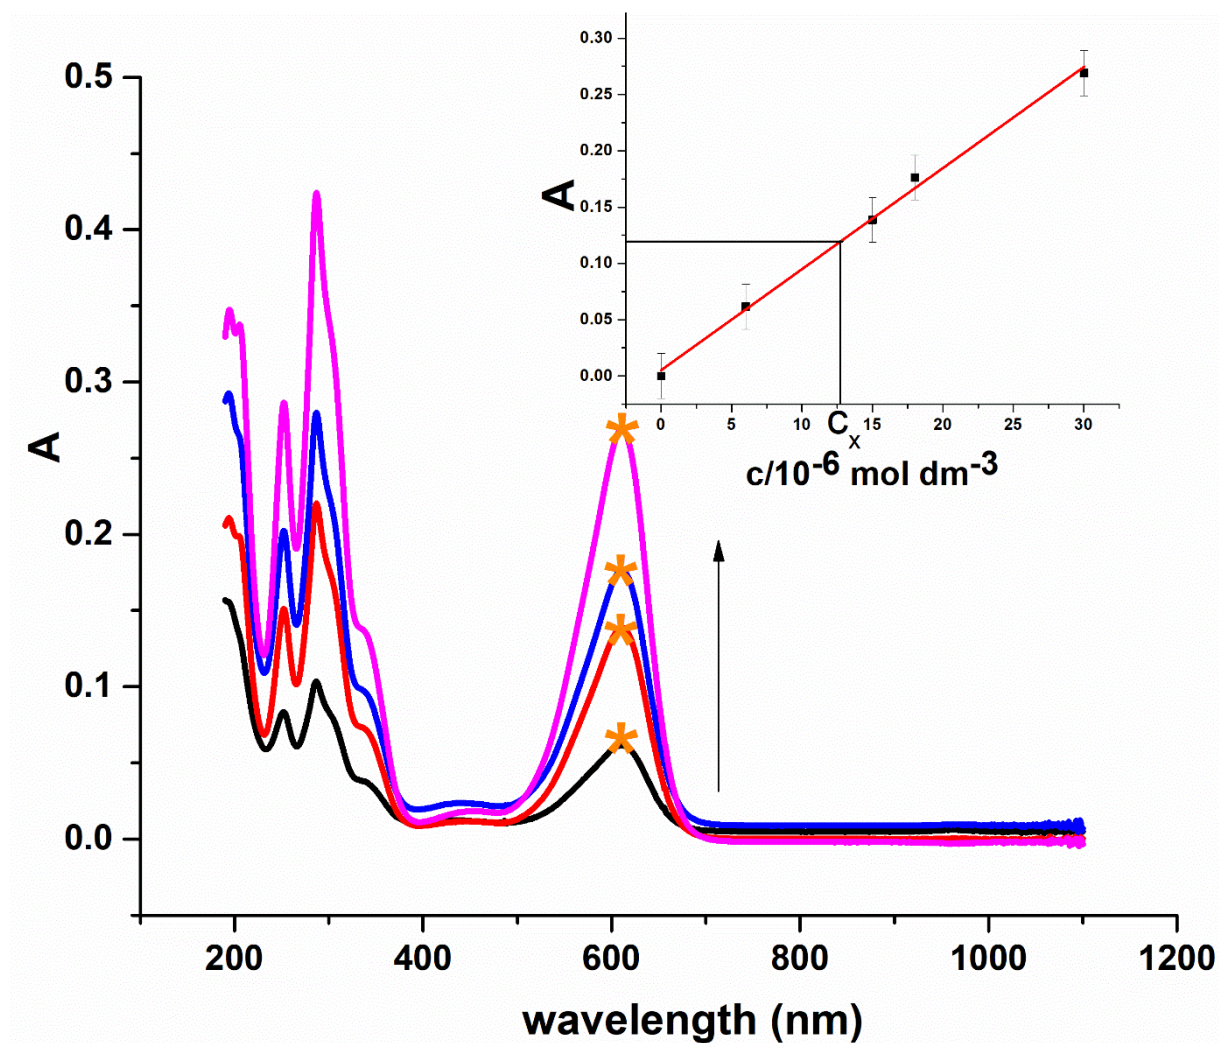

**Figure S4.** The indigo carmine standard concentrations' UV/Vis spectrum of  $3.00 \times 10^{-5} \text{ mol dm}^{-3}$ ;  $1.80 \times 10^{-5} \text{ mol dm}^{-3}$ ;  $1.50 \times 10^{-5} \text{ mol dm}^{-3}$  and  $0.60 \times 10^{-5} \text{ mol dm}^{-3}$  (the arrow indicating the rise of concentration). Insert: UV/Vis calibration curve (the dependence of  $A$  at  $\lambda_{\text{max}} = 611 \text{ nm}$  as a function of the concentrations).

Although the D-glucose yields no UV/Vis spectrum, the indigo carmine does, as presented in Figure S5.

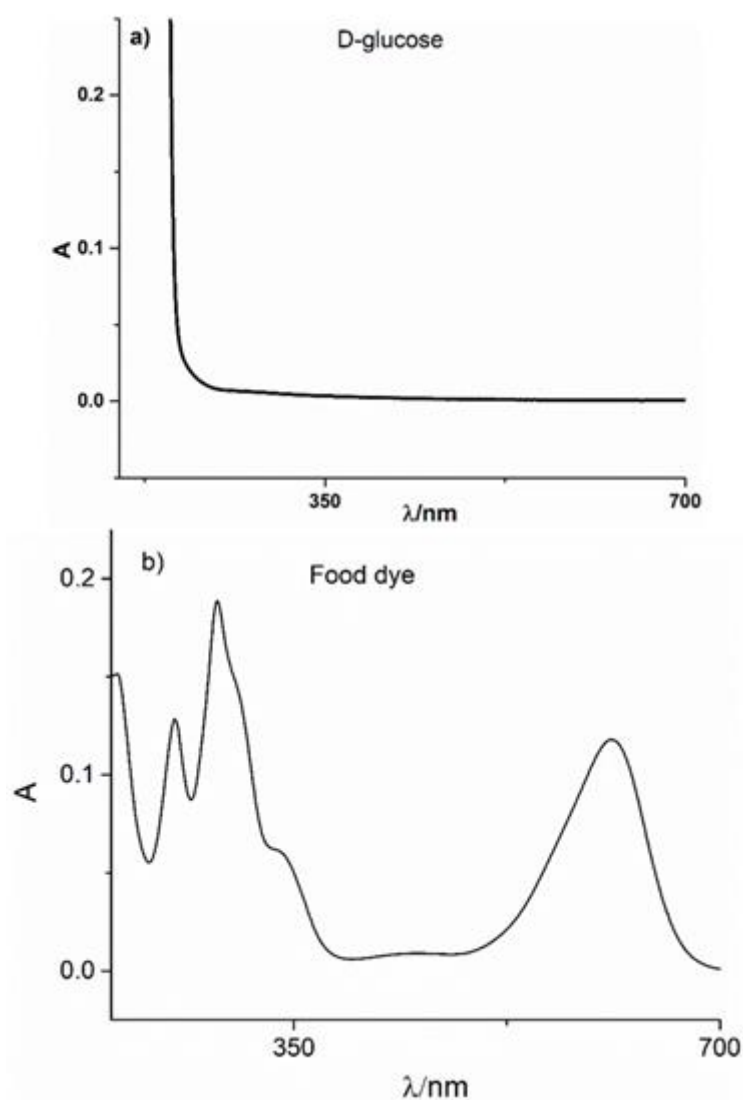

**Figure S5.** The UV/VIS spectrum of D-glucose **a)** food dye (mixture of indigo carmine and D-glucose) **b).**



## THE BRIGGS-RAUSCHER METHOD

The recorded Pt-potential vs. time series (or oscillogram) of the BR reaction free of analyte is shown at **Figure S6 a) in three oscillograms** . The influence of D-glucose (added at 30 s from the beginning of the BR reaction) to the oscillating BR reaction, as well as the basic BR oscillogram, are presented in **Figure S6 b)**.

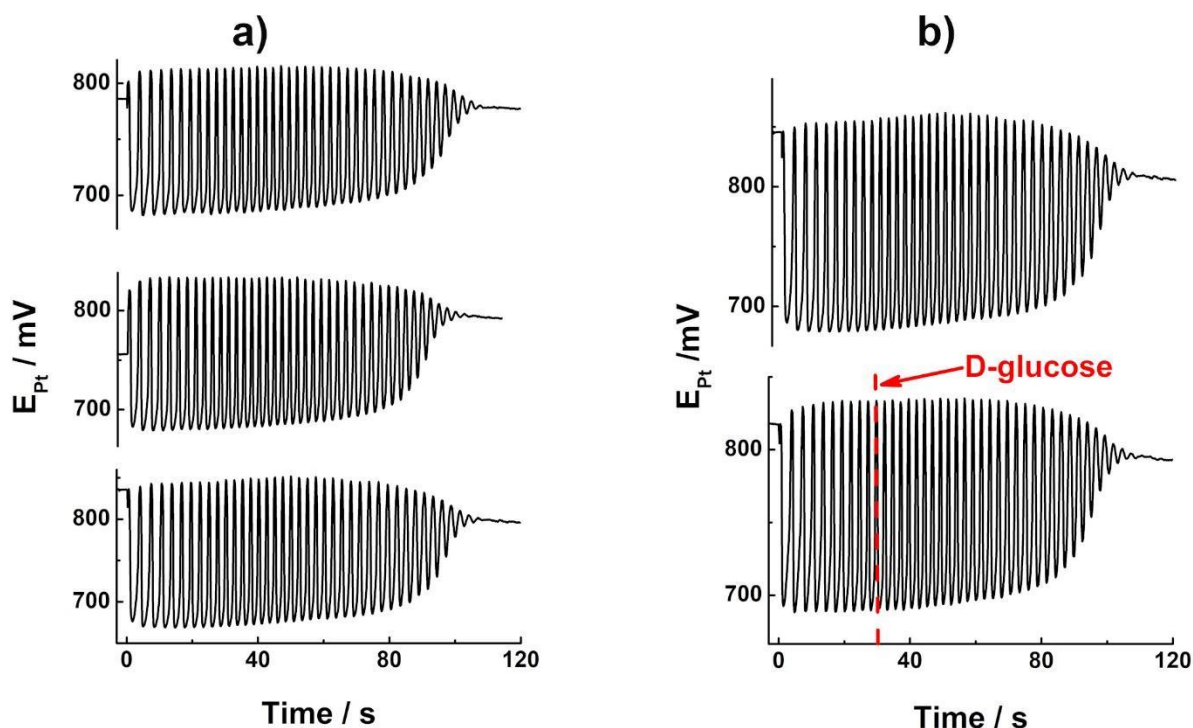

**Figure S6.** The Basic BR oscillogram in three oscillograms a) and the influence of D-glucose (100  $\mu$ l, 0.1 mol/dm<sup>3</sup>) to BR oscillogram b). The initial reactant concentrations in the system were  $[\text{CH}_2(\text{COOH})_2]_0 = 0.0789 \text{ mol dm}^{-3}$ ,  $[\text{MnSO}_4]_0 = 0.00752 \text{ mol dm}^{-3}$ ,  $[\text{HClO}_4]_0 = 0.03 \text{ mol dm}^{-3}$ ,  $[\text{KIO}_3]_0 = 0.0752 \text{ mol dm}^{-3}$  and  $[\text{H}_2\text{O}_2]_0 = 1.176 \text{ mol dm}^{-3}$ .

## **S REFERENCES:**

[S1] Analysis of the structure and vibrational spectra of glucose and fructose M.Ibrahim, M. Alaam, H. El-Haes, A. F. Jalbout, A. de Leon, Analysis of the structure and vibrational spectra of glucose and fructose, Eclet. Quim. 31(3) (2006) 15-21.

<https://doi.org/10.1590/S0100-46702006000300002>

[S2] M.V.Korolevich, R.G.Zhbankov, V.V.Sivchik, Calculation of absorption band frequencies and intensities in the IR spectrum of  $\alpha$ -d-glucose in a cluster, J. Mol. Struct., 220 (1990) 301-313. [https://doi.org/10.1016/0022-2860\(90\)80120-9](https://doi.org/10.1016/0022-2860(90)80120-9)
